# Supplementary material
Source: PubMed Central journal article supplement (PMC8183395)
Supplement: EMBR-22-e51323-s001.pdf [file EMBR-22-e51323-s001.pdf]

## Expanded View Figures

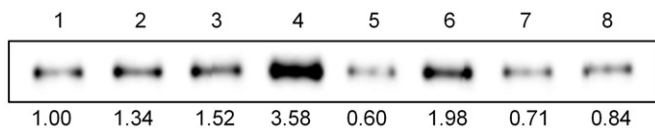

- 1: 100% POPC  
 2: 50% POPC, 50% POPE  
 3: 50% POPC, 40% POPE, 10% CL mix  
 4: 50% POPC, 30% POPE, 20% CL mix  
 5: 50% POPC, 40% POPE, 10% PtdIns(4)P  
 6: 50% POPC, 30% POPE, 20% PtdIns(4)P  
 7: 50% POPC, 40% POPE, 10% POPS  
 8: 50% POPC, 30% POPE, 20% POPS

**Figure EV1. Liposome precipitation-based phospholipid-binding assay.**

Results of the liposome precipitation assay of PTPIP51 with liposomes containing a CL mixture, PtdIns(4)P, and PS. The relative band intensities on Western blots were quantified using ImageJ (National Institutes of Health, USA).

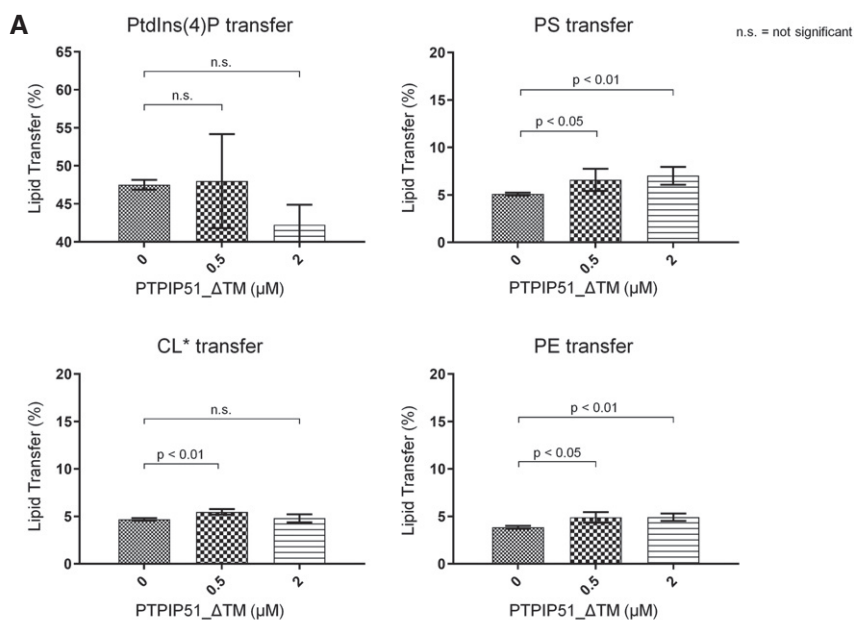**Figure EV2. Streptavidin–biotin bead-based phospholipid transfer assay.**

**A** Results of the *in vitro* phospholipid transfer assay with PTPIP51 and various phospholipids. The percentages of lipid transfer were calculated with the following formula:  $100 \times F_{\text{acceptor}} / (F_{\text{acceptor}} + F_{\text{donor}})$ . The data are presented as the mean  $\pm$  SD of technical quadruplicate experiments from one representative experiment ( $n = 2$ ), and *P*-values calculated using Student's *t*-test are shown.

**B** Two kinds of fluorescent CLs were used in this assay. The fluorescent MLCL in Fig 3 has the chemical structure shown in (1), and fluorescent CL\* has the chemical structure shown in (2).

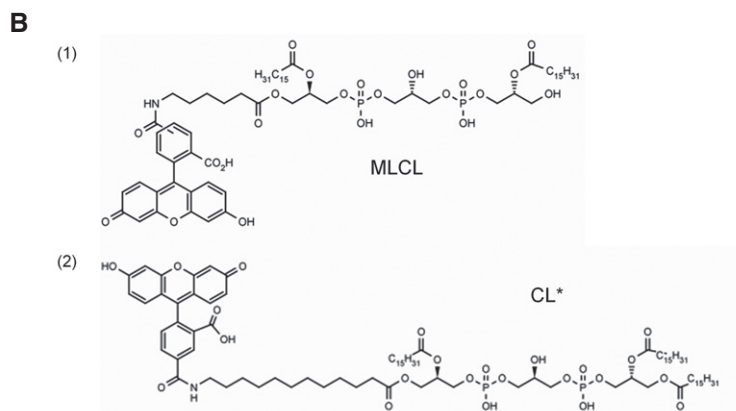

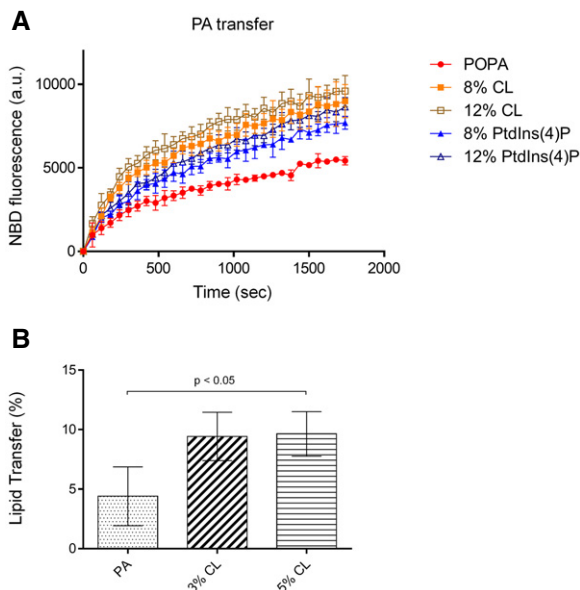

**Figure EV3. Lipid transfer assays in the presence of other PTPIP51-interacting phospholipids.**

Results of phospholipid transfer assays using PA-containing liposomes supplemented with a CL mixture or PtdIns(4)P. Liposomes with different contents were tested according to the type of transfer assay.

**A** FRET-based phospholipid transfer assay: acceptor liposomes (POPC:POPE:POPA = 50:40:10 (%)) and donor liposomes (POPC:POPE:Rhod-PE:NBD-PA = 50:40:2:8, POPC:POPE:Rhod-PE:NBD-PA/CL = 50:32:2:8:8 and 50:28:2:8:12, and POPC:POPE:Rhod-PE:NBD-PA/PtdIns(4)P = 50:32:2:8:8 and 50:28:2:8:12 (%)).

**B** Bead pulldown-based phospholipid transfer assay: acceptor liposomes (100% POPC) and donor liposomes (POPC/biotinyl cap-PE:TopFluor TMA-PA = 97:2:1, POPC:biotinyl cap-PE:TopFluor TMA-PA:CL = 94:2:1:3 and 92:2:1:5 (%)).

Data information: All data are presented as the mean  $\pm$  SD of technical quadruplicate experiments from one representative experiment ( $n = 2$ ). The  $P$ -value was calculated using one-way ANOVA.

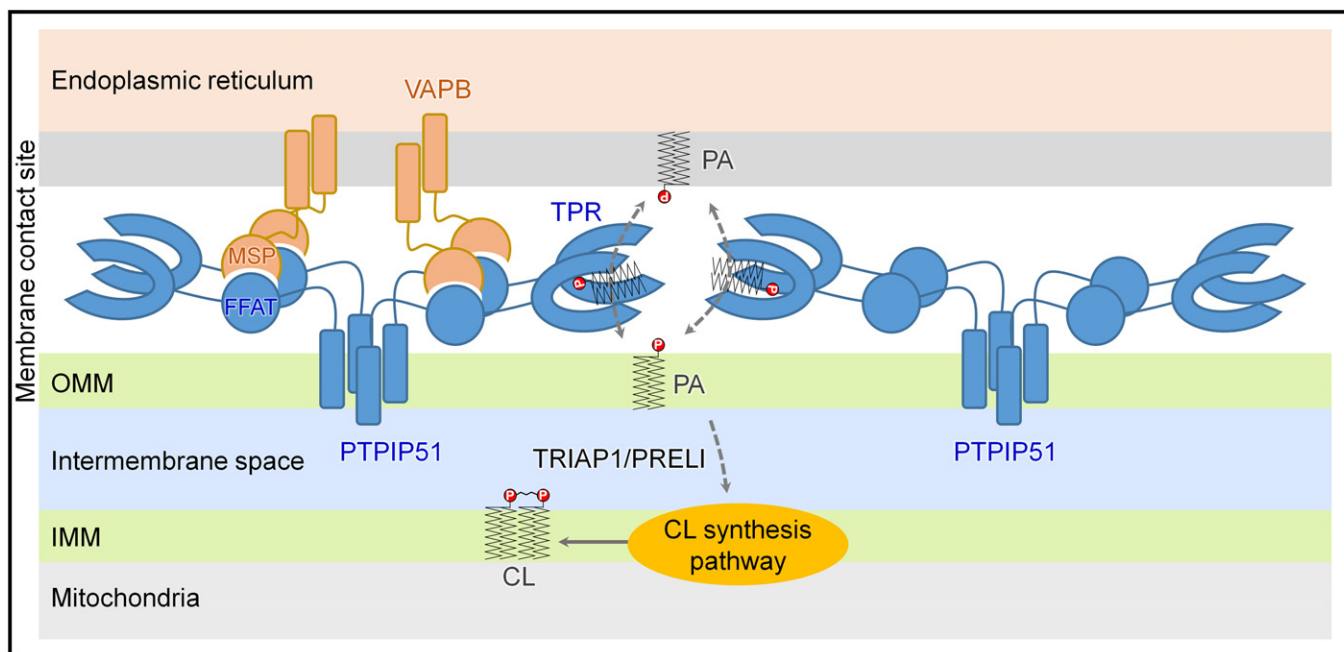

**Figure EV4. Model of the PTPIP51–VAPB complex at MAMs and its phospholipid transfer function.**

The interaction between tetrameric PTPIP51 and dimeric VAPB mediated by the FFAT-like motif and MSP domain of each protein is shown. The PA transfer function of the TPR domain of PTPIP51 is also presented.
